# Supplementary material for: Z-Scheme in a Co3(PO4)2/α-Fe2O3 photocatalysis system for overall water splitting under visible light
Source: Royal Society of Chemistry journal article supplement (doi:10.1039/c7cy02323e), 2017-12-28
Supplement: c7cy02323e1.pdf [file c7cy02323e1.pdf]

# Z-Scheme in $\text{Co}_3(\text{PO}_4)_2/\alpha\text{-Fe}_2\text{O}_3$ photocatalysis system for overall water splitting under visible light

## Supporting Information

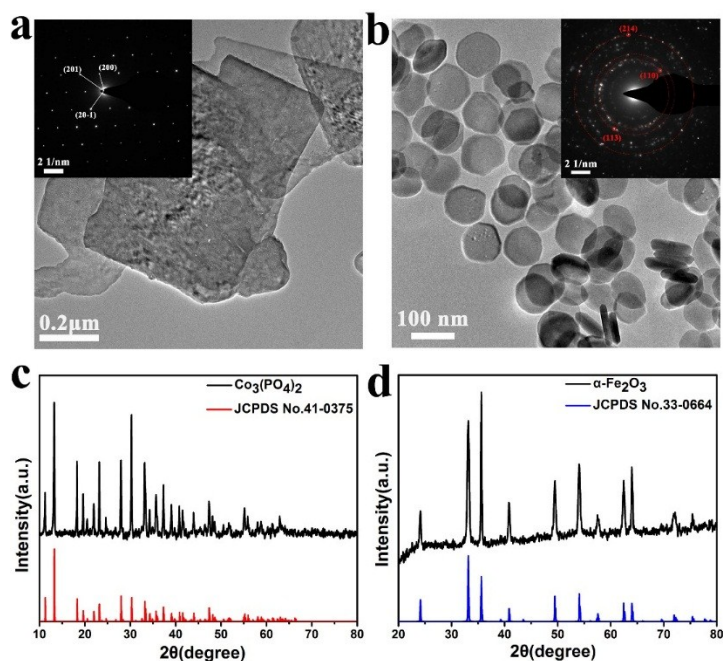

**Fig. S1.** (a) TEM image and the inset is the selected area electron diffraction pattern of  $\text{Co}_3(\text{PO}_4)_2$ . (b) TEM image and the inset is the selected area electron diffraction pattern of  $\alpha\text{-Fe}_2\text{O}_3$ . The XRD patterns of  $\text{Co}_3(\text{PO}_4)_2$  (c) and  $\alpha\text{-Fe}_2\text{O}_3$  (d).

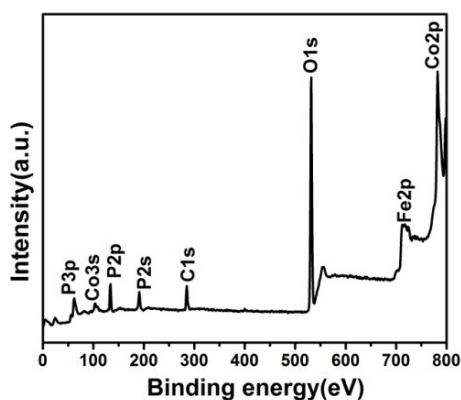

**Fig. S2.** Full XPS spectrum of  $\text{Co}_3(\text{PO}_4)_2/\alpha\text{-Fe}_2\text{O}_3$ -1.6%.

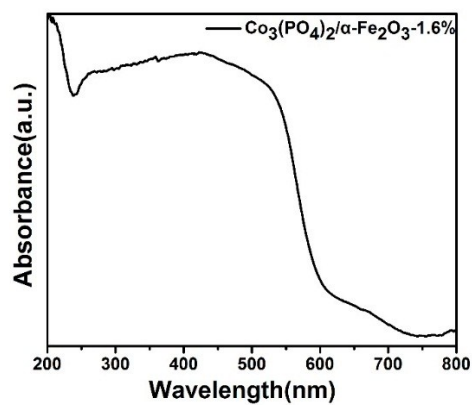

Fig. S3. UV-Vis absorbance spectrum of  $\text{Co}_3(\text{PO}_4)_2/\alpha\text{-Fe}_2\text{O}_3\text{-1.6\%}$ .

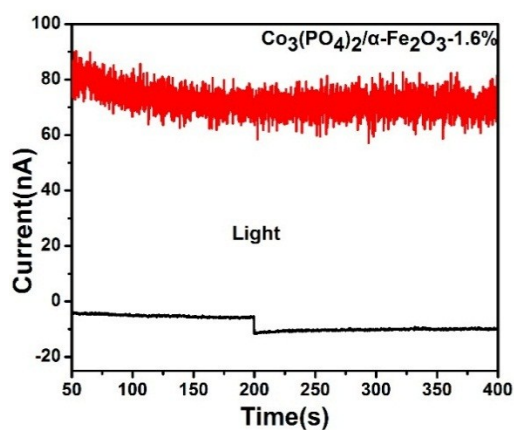

Fig. S4. The RRDE collection tests of  $\text{Co}_3(\text{PO}_4)_2/\alpha\text{-Fe}_2\text{O}_3\text{-1.6\%}$ .

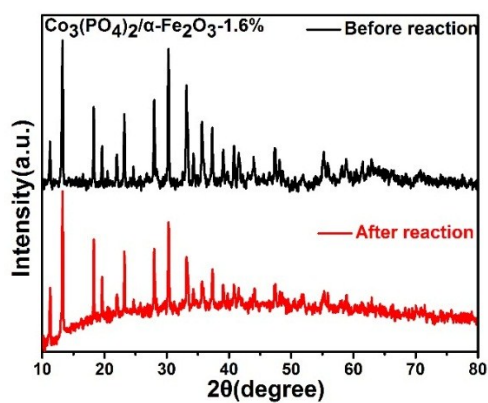

Fig. S5. The XRD patterns of  $\text{Co}_3(\text{PO}_4)_2/\alpha\text{-Fe}_2\text{O}_3\text{-1.6\%}$  before (black line) and after (red line) photocatalytic reaction.

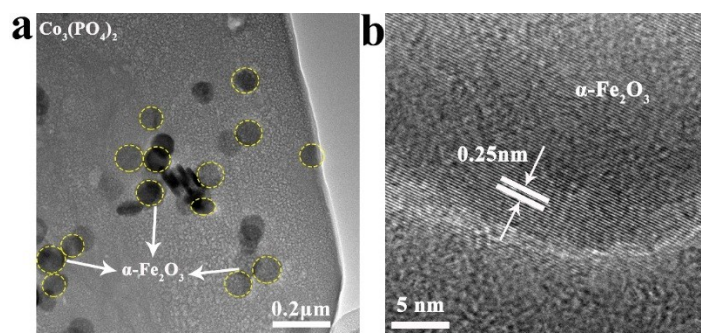

**Fig. S6.** (a) TEM image of  $\text{Co}_3(\text{PO}_4)_2/\alpha\text{-Fe}_2\text{O}_3$ -1.6% after photocatalytic reaction. (b) HRTEM image of  $\text{Co}_3(\text{PO}_4)_2/\alpha\text{-Fe}_2\text{O}_3$ -1.6% with obvious lattice spacing for  $\alpha\text{-Fe}_2\text{O}_3$  after photocatalytic reaction.

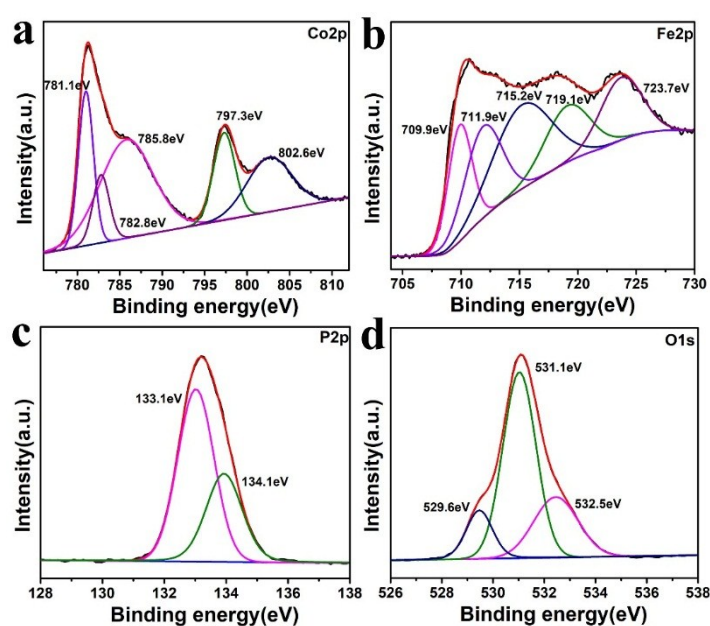

**Fig. S7.** High-resolution XPS spectra of  $\text{Co}_3(\text{PO}_4)_2/\alpha\text{-Fe}_2\text{O}_3$ -1.6% after photocatalytic reaction: (a) Co 2p, (b) Fe 2p, (c) P 2p and (d) O 1s.

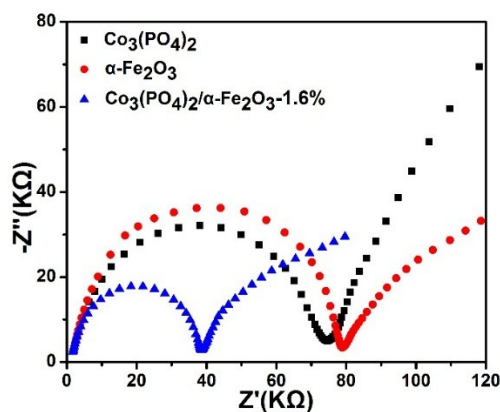

**Fig. S8.** Electrochemical impedance spectra of  $\text{Co}_3(\text{PO}_4)_2$ ,  $\alpha\text{-Fe}_2\text{O}_3$  and  $\text{Co}_3(\text{PO}_4)_2/\alpha\text{-Fe}_2\text{O}_3$ -1.6%.
